# Supplementary material for: Computational design of polaronic conductive Li-NASICON mixed ionic–electronic conductors
Source: Royal Society of Chemistry journal article supplement (doi:10.1039/d5ta00367a), 2025-01-01
Supplement: d5ta00367a1.pdf [file d5ta00367a1.pdf]

## Supporting Information

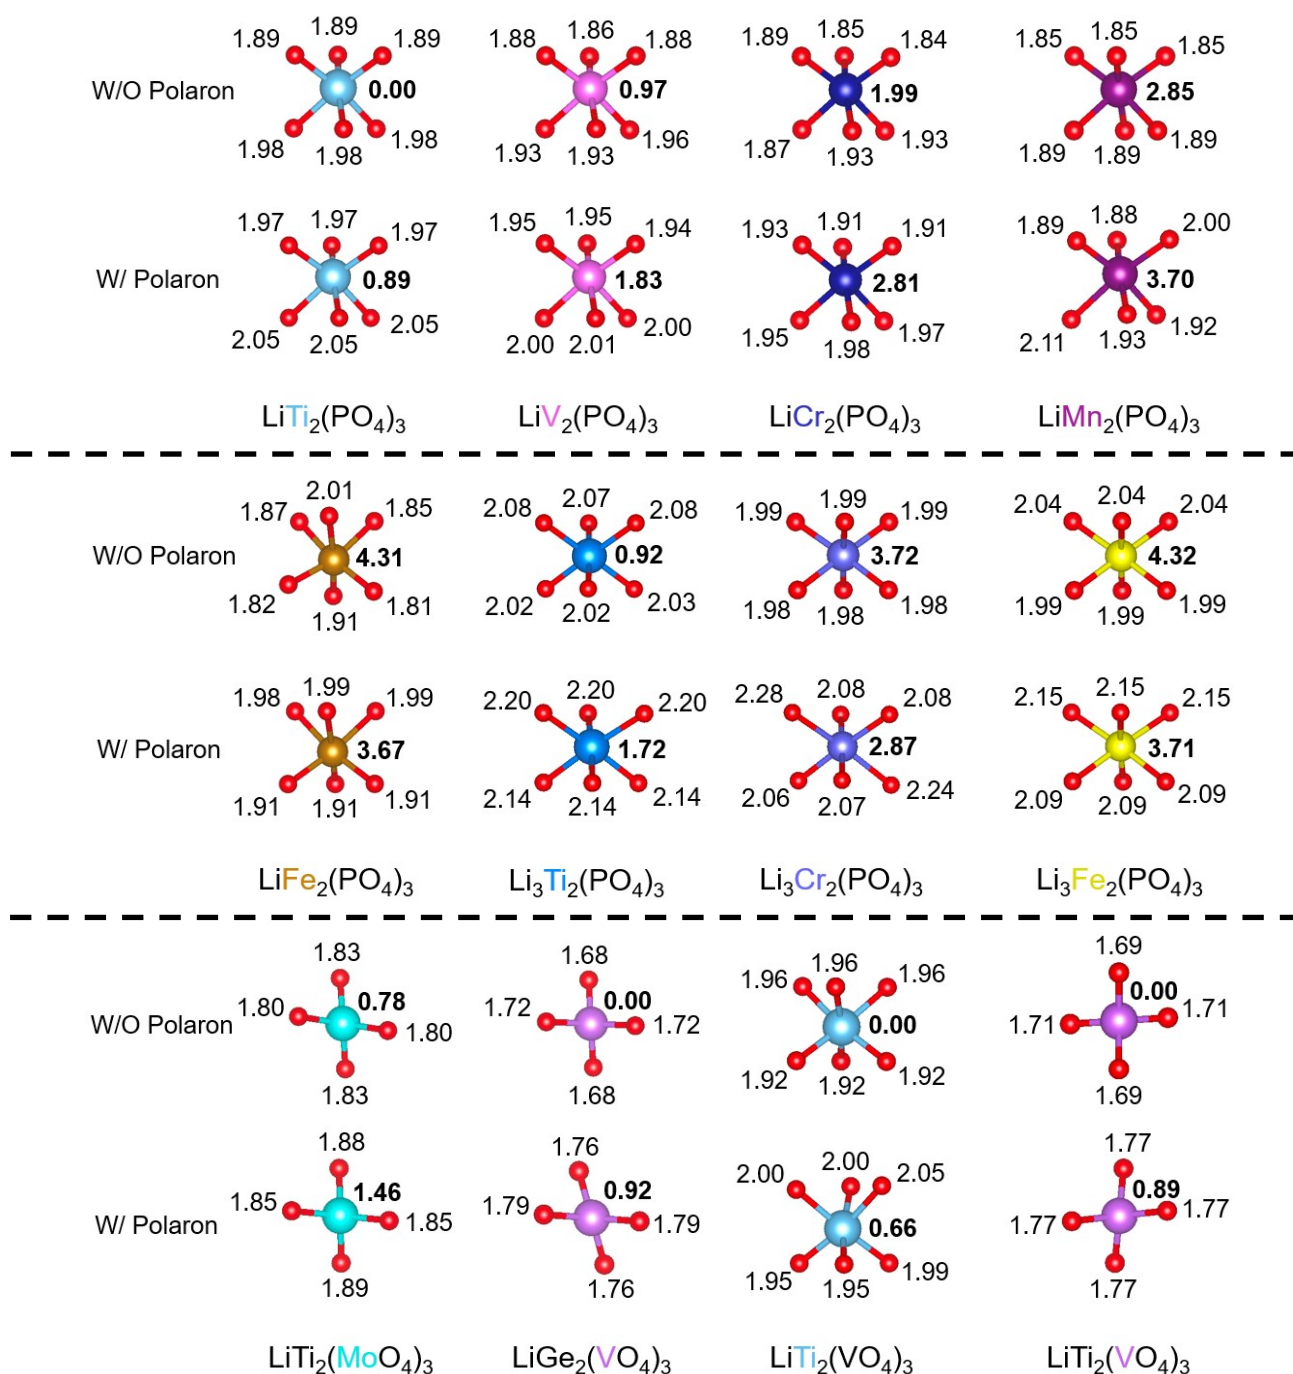

**Figure S1.** The TM-O bond lengths (Å) of pristine and polaronic local structures in Li-NASICONs. Bold letters denote magnetic moments of the TM atoms. Different colored spheres denote TM atoms, red spheres denote O atoms. The numbers near oxygen atoms denote TM-O bond lengths in Å, bold numbers near the center TM atoms denote their magnetic moments.

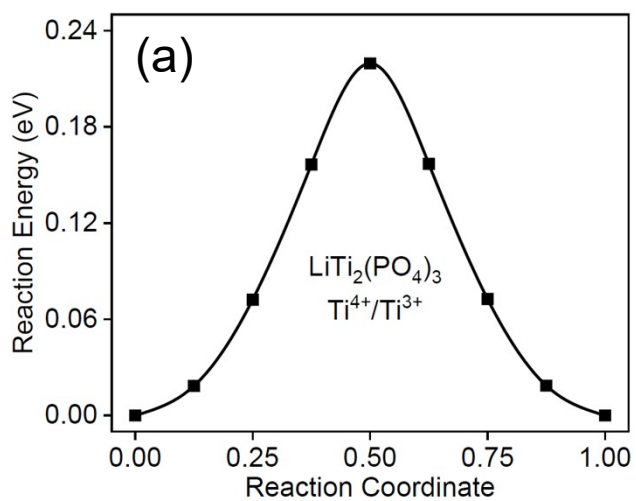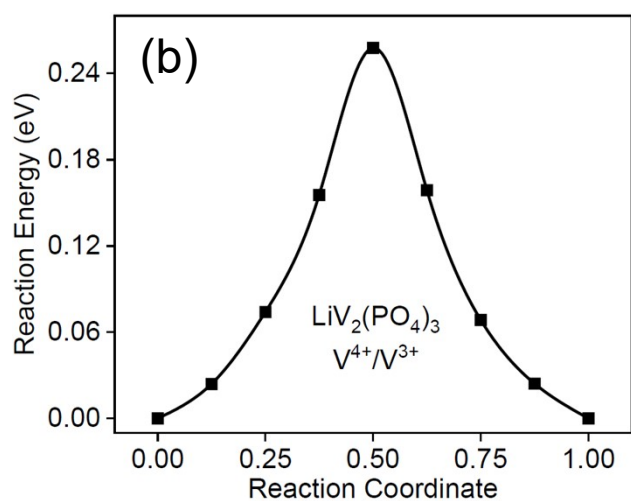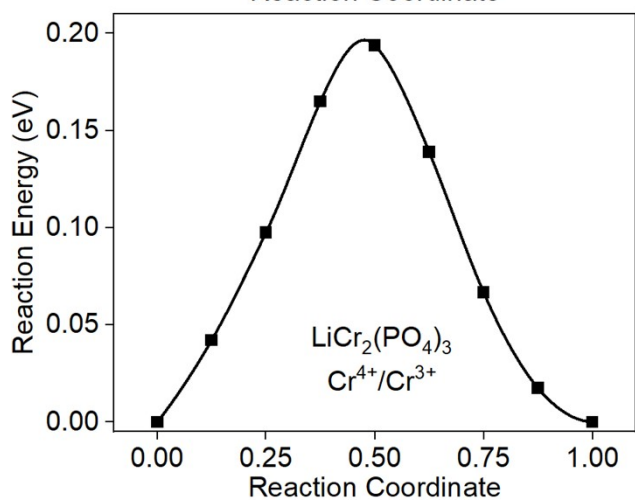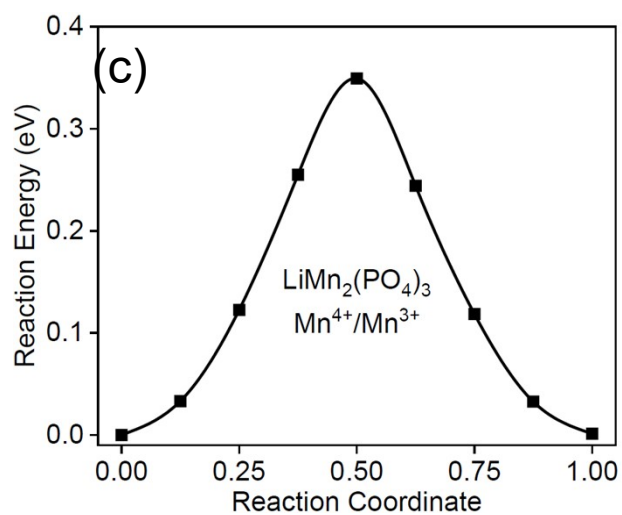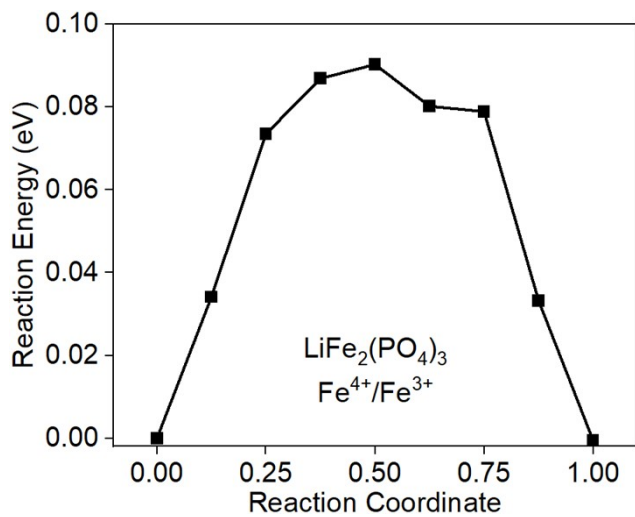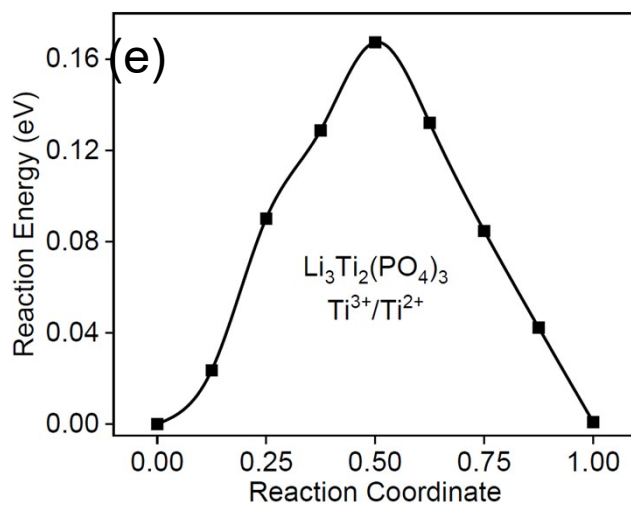

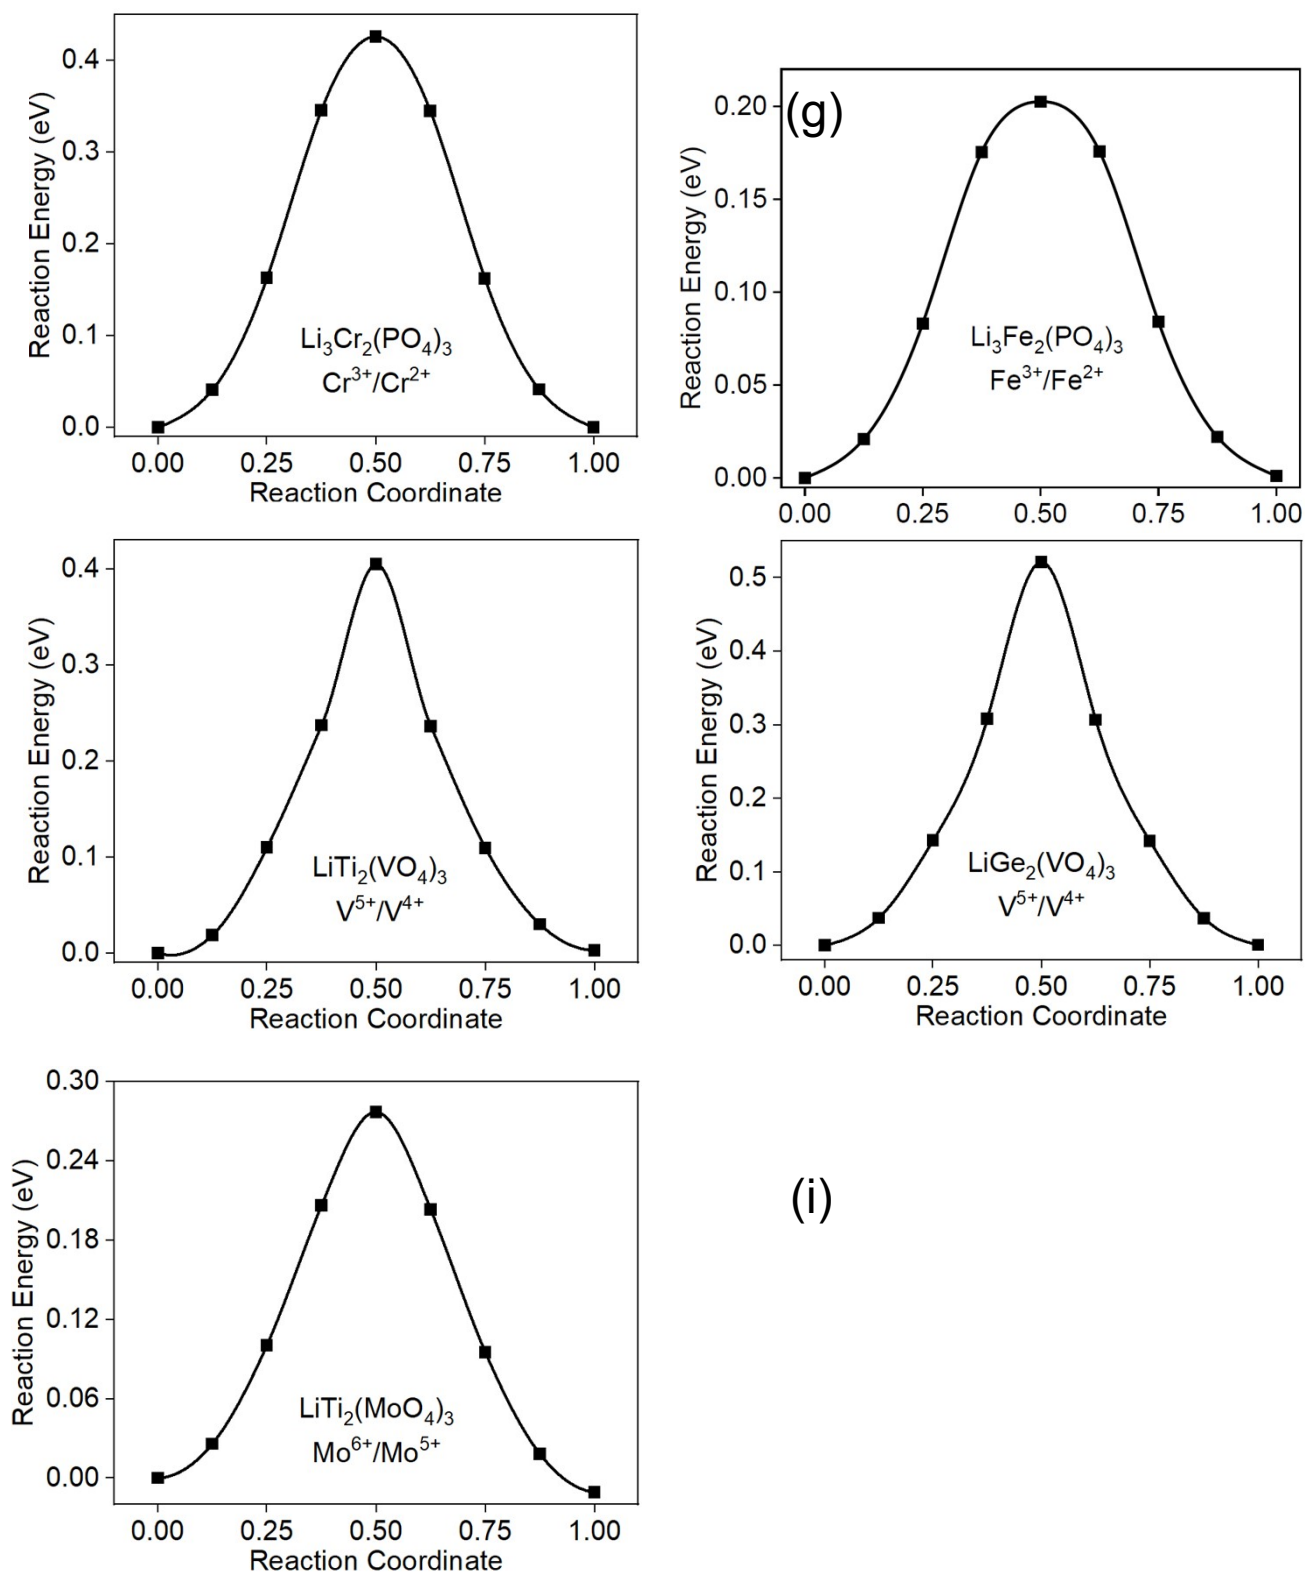

Figure S2. Polaron hopping energy curves of (a)  $\text{LiTi}_2(\text{PO}_4)_3$  (b)  $\text{LiK}_2(\text{PO}_4)_3$  (c)  $\text{LiCr}_2(\text{PO}_4)_3$  (d)  $\text{LiMn}_2(\text{PO}_4)_3$  (e)  $\text{LiFe}_2(\text{PO}_4)_3$  (f)  $\text{Li}_3\text{Ti}_2(\text{PO}_4)_3$  (g)  $\text{Li}_3\text{Cr}_2(\text{PO}_4)_3$  (h)  $\text{Li}_3\text{Fe}_2(\text{PO}_4)_3$  (i)  $\text{LiTi}_2(\text{VO}_4)_3$  (j)  $\text{LiGe}_2(\text{VO}_4)_3$  (k)  $\text{LiTi}_2(\text{MoO}_4)_3$ .

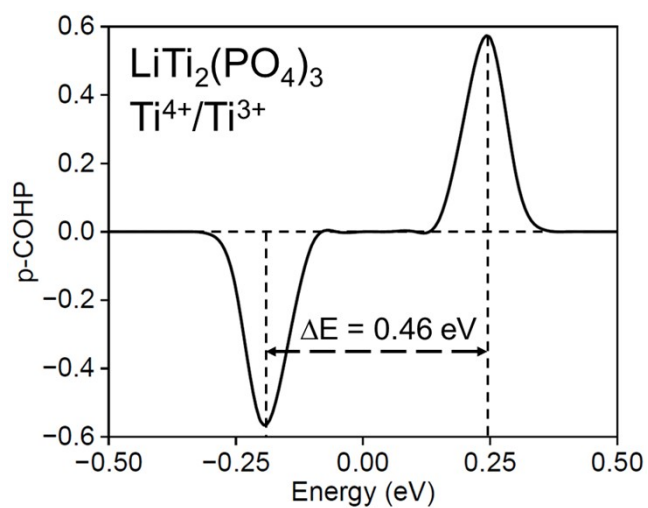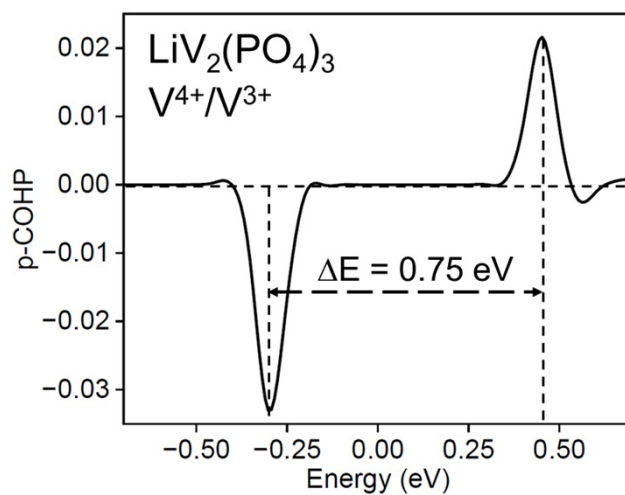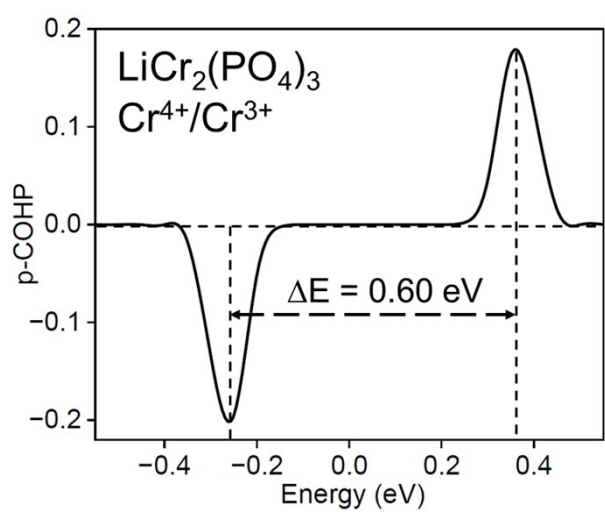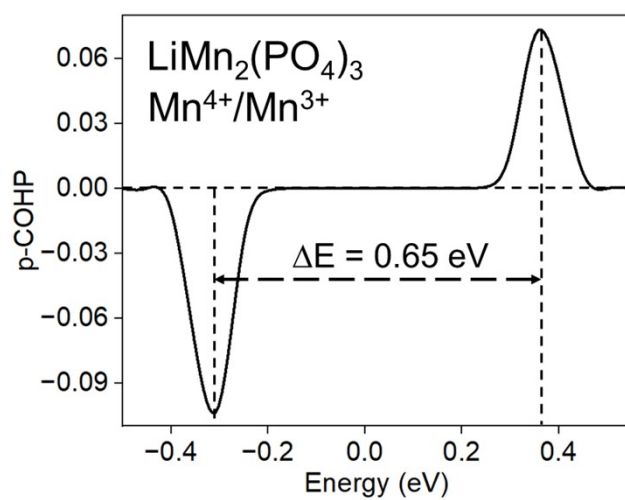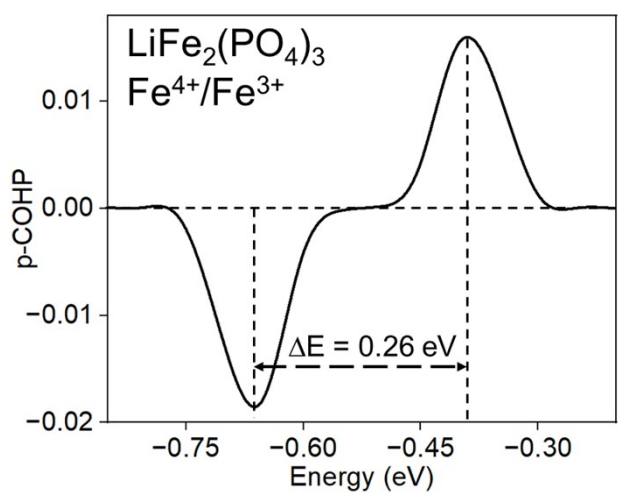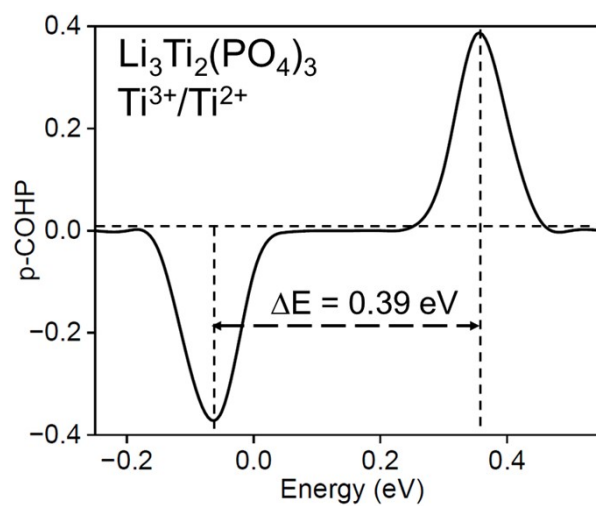

(a)

(b)

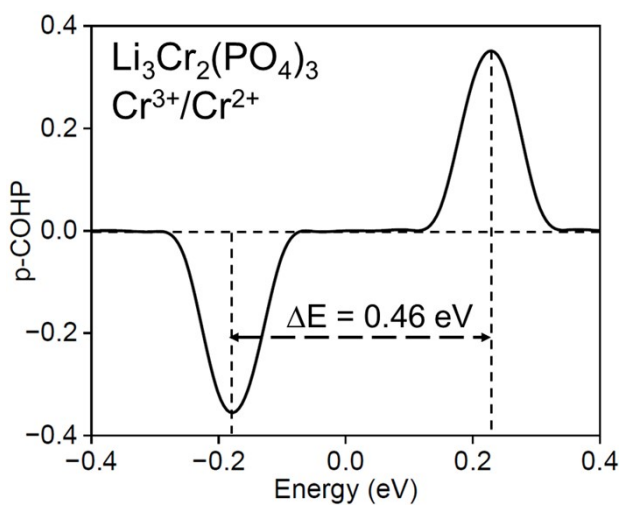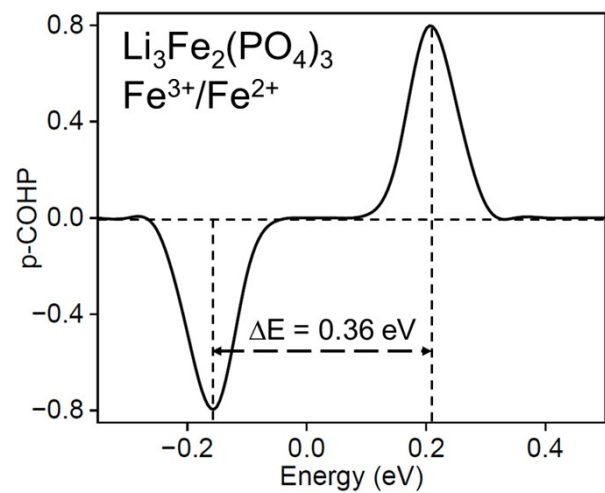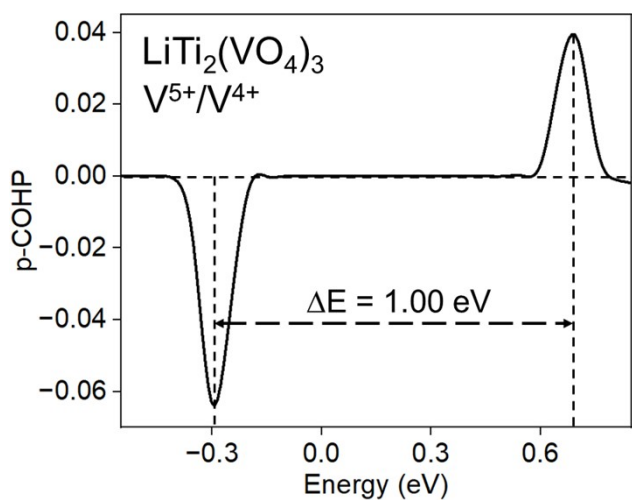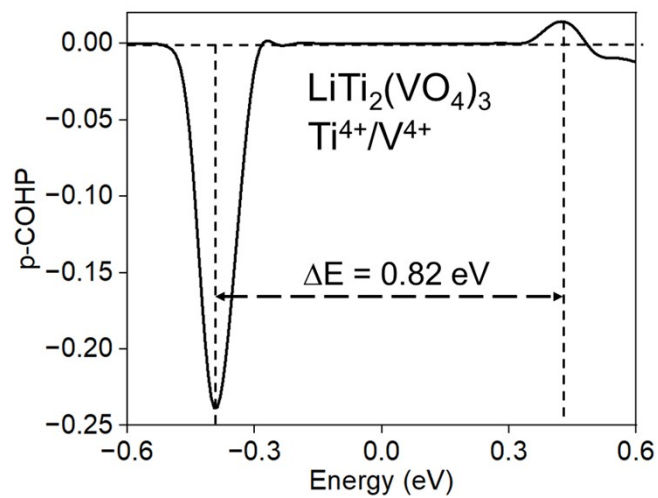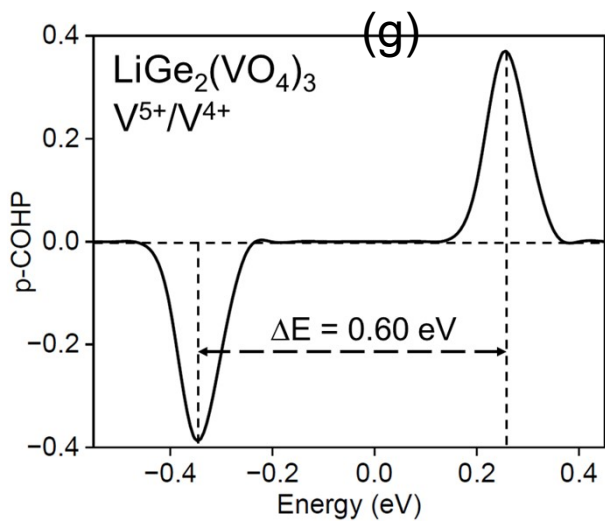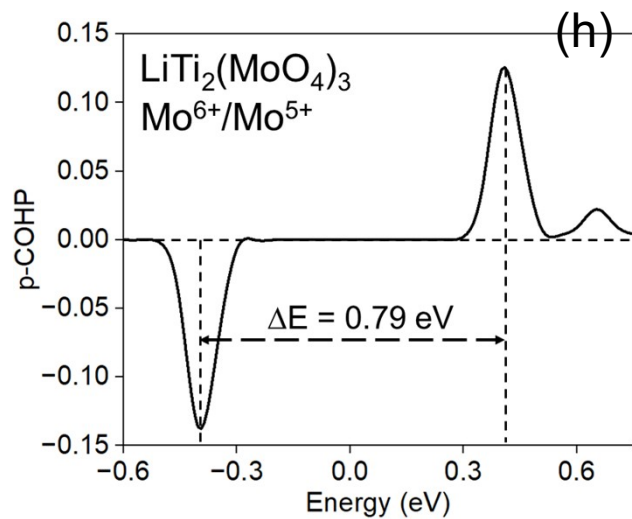

(i)

(j)

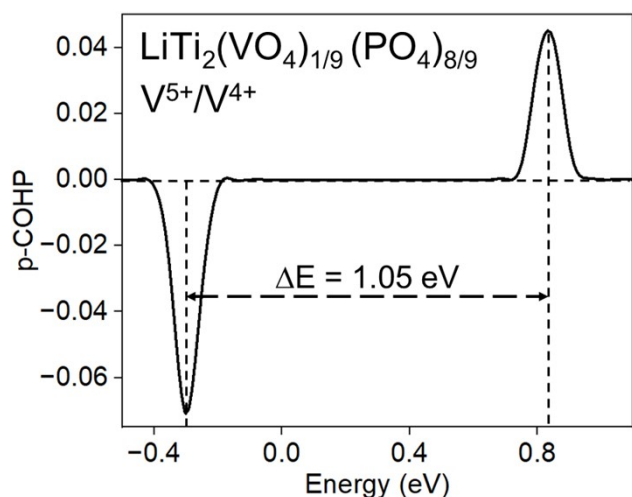

(m)

**Figure S3.** Polaronic bonding states and antibonding states of (a)  $\text{LiTi}_2(\text{PO}_4)_3$ , (b)  $\text{LiV}_2(\text{PO}_4)_3$ , (c)  $\text{LiCr}_2(\text{PO}_4)_3$ , (d)  $\text{LiMn}_2(\text{PO}_4)_3$ , (e)  $\text{LiFe}_2(\text{PO}_4)_3$ , (f)  $\text{Li}_3\text{Ti}_2(\text{PO}_4)_3$ , (g)  $\text{Li}_3\text{Cr}_2(\text{PO}_4)_3$ , (h)  $\text{Li}_3\text{Fe}_2(\text{PO}_4)_3$ , (i)  $\text{LiTi}_2(\text{VO}_4)_3$  with tet-tet hopping, (j)  $\text{LiTi}_2(\text{VO}_4)_3$  with oct-tet hopping, (k)  $\text{LiGe}_2(\text{VO}_4)_3$  (l)  $\text{LiTi}_2(\text{MoO}_4)_3$ , (m)  $\text{LiTi}_2(\text{VO}_4)_{1/9}(\text{PO}_4)_{8/9}$ .  $\Delta E$  denotes the energy gap between polaronic bonding and antibonding states. The charge transfer integral is estimated to be  $\frac{1}{2} \Delta E$ .

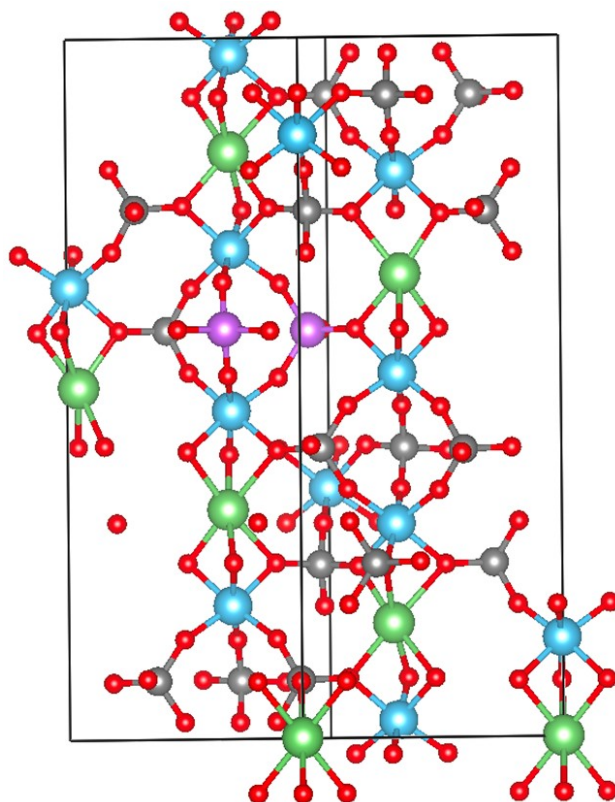

**Figure S4.** Crystal models for the simulation of polaron hopping in  $\text{LiTi}_2(\text{VO}_4)_{1/9}(\text{PO}_4)_{8/9}$ . Green spheres denote Li, blue spheres denote Ti, gray spheres denote P, purple spheres denote V and red spheres denote O.

**Table S1. Bond lengths of Jahn-Teller distortion active TM-O<sub>6</sub> octahedron in Li-NASICONs.**

|                                  | Bond 1 | Bond 2 | Bond 3 | Bond 4 | Bond 5 | Bond 6 |
|----------------------------------|--------|--------|--------|--------|--------|--------|
| Fe <sup>4+</sup> -O <sub>6</sub> | 1.87   | 2.01   | 1.85   | 1.82   | 1.91   | 1.81   |
| Mn <sup>3+</sup> -O <sub>6</sub> | 1.89   | 1.88   | 2.00   | 2.11   | 1.90   | 1.92   |
| Cr <sup>2+</sup> -O <sub>6</sub> | 2.28   | 2.08   | 2.08   | 2.06   | 2.07   | 2.24   |

Unit: Å

**Table S2. The lattice volumes of Li-NASICONs.**

|                                                                 |         |
|-----------------------------------------------------------------|---------|
| LiTi <sub>2</sub> (PO <sub>4</sub> ) <sub>3</sub>               | 1311.31 |
| LiV <sub>2</sub> (PO <sub>4</sub> ) <sub>3</sub>                | 1271.79 |
| LiCr <sub>2</sub> (PO <sub>4</sub> ) <sub>3</sub>               | 1239.68 |
| LiMn <sub>2</sub> (PO <sub>4</sub> ) <sub>3</sub>               | 1215.19 |
| LiFe <sub>2</sub> (PO <sub>4</sub> ) <sub>3</sub>               | 1186.21 |
| Li <sub>3</sub> Ti <sub>2</sub> (PO <sub>4</sub> ) <sub>3</sub> | 1394.42 |
| Li <sub>3</sub> Cr <sub>2</sub> (PO <sub>4</sub> ) <sub>3</sub> | 1315.96 |
| Li <sub>3</sub> Fe <sub>2</sub> (PO <sub>4</sub> ) <sub>3</sub> | 1350.52 |
| LiTi <sub>2</sub> (VO <sub>4</sub> ) <sub>3</sub>               | 1503.70 |
| LiGe <sub>2</sub> (VO <sub>4</sub> ) <sub>3</sub>               | 1429.82 |
| LiTi <sub>2</sub> (MoO <sub>4</sub> ) <sub>3</sub>              | 1666.99 |

Unit: Å<sup>3</sup>

The electrochemical stability window is calculated by constructing the grand potential  $\Psi$ , which is a Legendre transformation of the enthalpy with respect to the lithium chemical potential, i.e.,  $\Psi = E - u_{\text{Li}} \times n_{\text{Li}}$ , where  $E$  is the enthalpy of a Li-NASICON compound,  $u_{\text{Li}}$  is the lithium chemical potential, and  $n_{\text{Li}}$  is the Li concentration in each compound. To maintain compatibility with the Materials Project database, we compute the energies of each Li-NASICONs using the GGA/GGA+U functional. To construct the grand potential phase diagrams, we query all phases within each compound's respective chemical space from the Materials Project database. We determine the oxidative and reductive potential by scanning  $u_{\text{Li}}$  in increment of 0.01 eV to identify the chemical potential range where the Li-NASICON compound remains stable. We note that these electrochemical stability windows do not account for the possibility of Li (de)intercalation, which may occur due to potential mixed ionic electronic conductivities.

**Table S3. The electromical stability window of Li-NASICONs considered in this work.**

|                                         |           |
|-----------------------------------------|-----------|
| $\text{LiTi}_2(\text{PO}_4)_3$          | 2.15~4.64 |
| $\text{LiV}_2(\text{PO}_4)_3$           | 3.53~4.01 |
| $\text{LiCr}_2(\text{PO}_4)_3$          | 4.25~4.30 |
| $\text{LiMn}_2(\text{PO}_4)_3$          | 4.28~4.34 |
| $\text{LiFe}_2(\text{PO}_4)_3$          | 4.23~4.41 |
| $\text{Li}_3\text{Ti}_2(\text{PO}_4)_3$ | 2.09~2.12 |
| $\text{Li}_3\text{Cr}_2(\text{PO}_4)_3$ | 2.34~4.27 |
| $\text{Li}_3\text{Fe}_2(\text{PO}_4)_3$ | 3.32~4.18 |
| $\text{LiTi}_2(\text{VO}_4)_3$          | 3.19~3.91 |
| $\text{LiGe}_2(\text{VO}_4)_3$          | 3.57~4.10 |

Unit: V (vs Li/Li<sup>+</sup>)
